# Supplementary material
Source: PubMed Central journal article supplement (PMC4374152)
Supplement: NIHMS62069-supplement-1.pdf [file NIHMS62069-supplement-1.pdf]

### Supplementary Figure 1

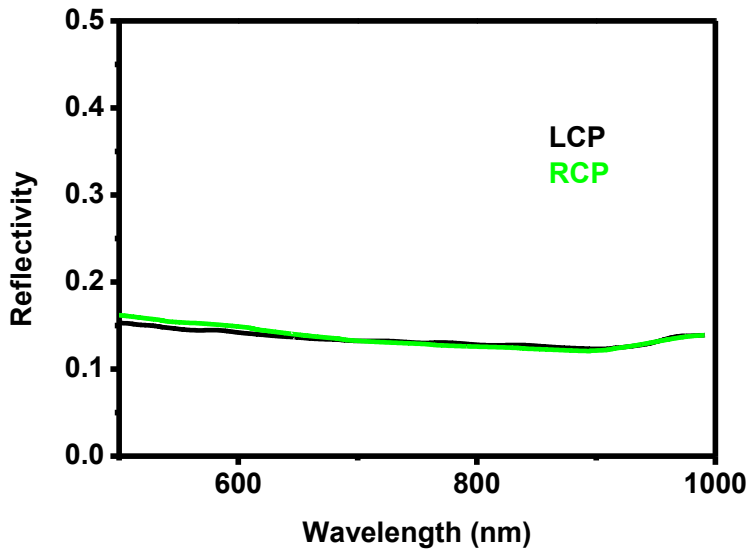

#### Measured LCP and RCP reflection spectra for THN array in the visible range

Reflection spectra on THN array were measured using a confocal system coupled with an inverted optical microscope and using a 40x objective lens (NA 0.9). Light reflected from the sample was focused and spatially selected on the monochromator entrance slits, and a CCD was used for measurements in the visible range. Finally reflectance spectra were normalized with respect to the reflected light by a calibrated silver mirror.

Supplementary Figure 2

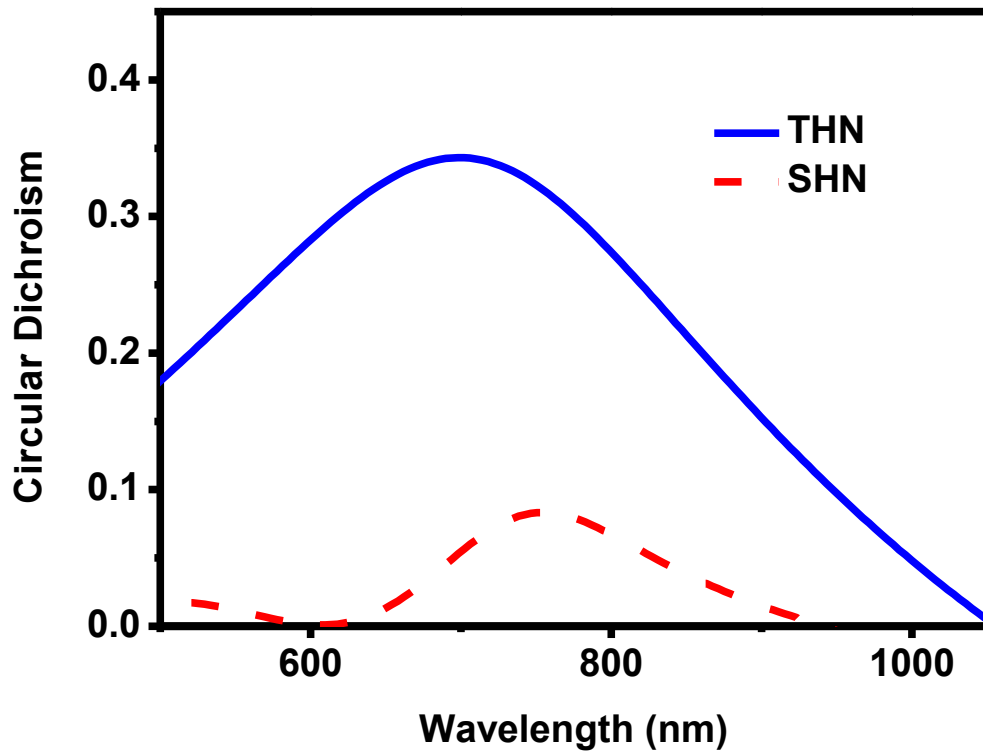

**Simulated circular dichroism of the SHN and THN array with different dichroic bandwidth**

Supplementary Figure 2 shows simulated circular dichroism of SHN and THN array (10  $\mu\text{m}$  x10  $\mu\text{m}$ ) with the same geometrical parameters: ED=375 nm, WD=110 nm, VP=705 nm, LP=700 nm. The SHN array exhibits a circular dichroism value up to 10% while the THN array reaches a circular dichroism value up to 35%, in good agreement with the optical measures. In particular, the dichroic selection band for SHN is around 300 nm (from 630 nm to 930 nm), while for THN array shows a broad dichroic band covering the whole measured visible range (from 500 nm to 1000 nm).
